# Supplementary material for: Autophagy gene-dependent intracellular immunity triggered by interferon-γ
Source: PubMed Central journal article supplement (PMC10746157; doi:10.1128/mbio.02332-23), 2023-10-31
Supplement: mbio.02332-23-s0001.pdf [file mbio.02332-23-s0001.pdf]

**A**

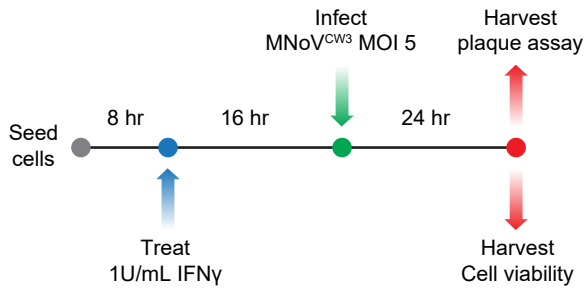

Figure S1. Schematic for seeding, treatment and norovirus infection. Experimental workflow for IFN $\gamma$  treatment and virus infection in BV-2 cells.
