# Supplementary material for: Autophagy gene-dependent intracellular immunity triggered by interferon-γ
Source: PubMed Central journal article supplement (PMC10746157; doi:10.1128/mbio.02332-23), 2023-10-31
Supplement: mbio.02332-23-s0003.pdf [file mbio.02332-23-s0003.pdf]

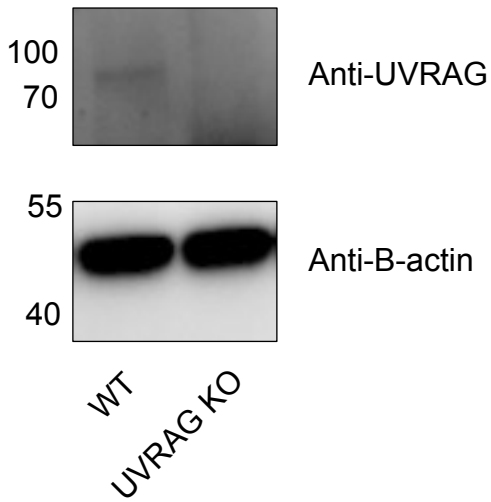

Figure S3. Uvr<sup>g</sup><sup>-/-</sup> BV-2 cells lack UVRAG protein. Western blot detection of endogenous UVRAG protein in WT or Uvr<sup>g</sup><sup>-/-</sup> BV-2 cells,  $\beta$ -ACTIN was used as a protein loading control.
