# Supplementary material for: Autophagy gene-dependent intracellular immunity triggered by interferon-γ
Source: PubMed Central journal article supplement (PMC10746157; doi:10.1128/mbio.02332-23), 2023-10-31
Supplement: mbio.02332-23-s0004.pdf [file mbio.02332-23-s0004.pdf]

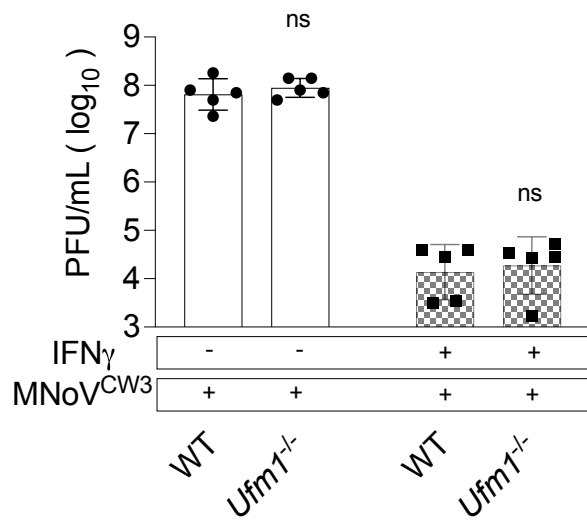

Figure S4. Ufm1 is not required for IFN $\gamma$ -induced inhibition of norovirus replication in BV-2 cells. Plaque assay of WT or Ufm1<sup>-/-</sup> BV-2 cells. Average data pooled from two independent experiments are represented as means  $\pm$  SEM. P value  $\leq$  0.05 (\*),  $\leq$  0.01 (\*\*),  $\leq$  0.001 (\*\*\*),  $\leq$  0.0001 (\*\*\*\*) were considered statistically significant. ns, not significant. P value determined by 2-way ANOVA with Dunnett's multiple comparison test.
