# Supplementary material for: Autophagy gene-dependent intracellular immunity triggered by interferon-γ
Source: PubMed Central journal article supplement (PMC10746157; doi:10.1128/mbio.02332-23), 2023-10-31
Supplement: mbio.02332-23-s0005.pdf [file mbio.02332-23-s0005.pdf]

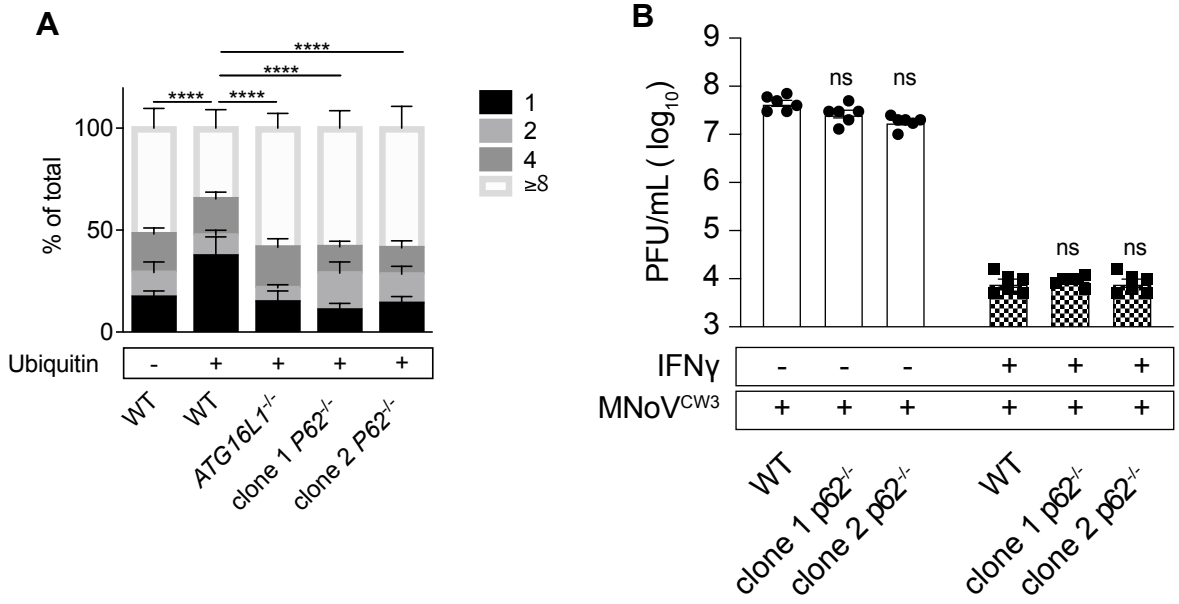

Figure S5. p62 is not required for IFN $\gamma$ -induced inhibition of norovirus replication in BV-2 cells; P62 is required for IFN $\gamma$ -induced growth restriction of *T. gondii* in HeLa cells. (A) P62<sup>-/-</sup> HeLa cells were treated with IFN $\gamma$  and infected with *T. gondii*. Parasites within ubiquitin positive (+) and ubiquitin negative (-) vacuoles were counted by immunofluorescence microscopy. (B) Plaque assay of WT or p62<sup>-/-</sup> BV-2 cells. Average data pooled from 2-3 independent experiments are represented as means  $\pm$  SEM. P value  $\leq$  0.05 (\*),  $\leq$  0.01 (\*\*),  $\leq$  0.001 (\*\*\*),  $\leq$  0.0001 (\*\*\*\*) were considered statistically significant. ns, not significant. For *T. gondii* assay, P value determined by 2-way ANOVA with Tukey's multiple comparison test; for plaque assay P value determined by 2-way ANOVA with Dunnett's multiple comparison.
